# Supplementary material
Source: PubMed Central journal article supplement (PMC5586490)
Supplement: NIHMS898985-supplement-supplement_1.pdf [file NIHMS898985-supplement-supplement_1.pdf]

## Supplementary Materials

fig. S1. Diversity indices of *IGH* and *TRB* repertoire.

fig. S2. Differential usage of *V*, *D* and *J* genes in the *IGH* and *TRB* repertoires of patients with RAG deficiency.

fig. S3. Characteristics of the CDR3 region of *IGH* and *TRB* total sequences in peripheral blood lymphocytes.

fig. S4. P and N nucleotide addition in the CDR3 of unique *IGH* and *TRB* sequences from controls and patients with RAG mutations and various clinical phenotypes.

fig. S5. Germline index and frequency of sequences without P and N nucleotides in the *TRB* repertoire of patients with RAG deficiency and controls.

fig. S6. Distribution of immunoglobulin heavy chain isotypes among total *IGH* sequences from controls and patients with RAG deficiency.

fig. S7. Inference of antigen-mediated selection in combined and individual IgM, IgG and IgE isotype transcripts from healthy controls and patients with RAG deficiency.

Table S1. Clinical and laboratory features of patients with RAG deficiency

Table S2. Summary of *RAG* mutations, recombination activity, and results of *IGH* and *TRB* sequencing in healthy donors and patients with RAG deficiency

Table S3. Raw data for all the figures (named “data for Fig 1-6” and “data for Suppl Fig 2-6) and sequence of *IGH* and *TRB* transcripts from healthy controls and patients with RAG deficiency.

## **Supplementary Materials**

**Table S1. Clinical and laboratory features of patients with RAG deficiency**

|                                                            | Patients grouped by clinical phenotype         |                          |                            |                            |                            |                            |                            |                            |                            |                            |                            |                              |
|------------------------------------------------------------|------------------------------------------------|--------------------------|----------------------------|----------------------------|----------------------------|----------------------------|----------------------------|----------------------------|----------------------------|----------------------------|----------------------------|------------------------------|
|                                                            | <i>CID with autoimmunity and/or granulomas</i> |                          |                            |                            | <i>Leaky SCID</i>          |                            |                            | <i>Omenn syndrome</i>      |                            |                            |                            |                              |
|                                                            | CID1                                           | CID2                     | CID3                       | CID4                       | LS1                        | LS2                        | LS3                        | OS1                        | OS2                        | OS3                        | OS4                        | OS5                          |
| Gene defect<br>(mutation)                                  | <i>RAG1</i><br>H612R;K86fs                     | <i>RAG2</i><br>F62L;F62L | <i>RAG1</i><br>F974L;R841Q | <i>RAG1</i><br>W522C;R973C | <i>RAG1</i><br>K86fs;K86fs | <i>RAG1</i><br>K86fs;R404Q | <i>RAG1</i><br>R108X;R108X | <i>RAG1</i><br>R561H;R624C | <i>RAG1</i><br>K391E;K391E | <i>RAG1</i><br>R396C;R737H | <i>RAG1</i><br>W959X;W959X | <i>RAG1</i><br>C469fs;C469fs |
| Age at diagnosis                                           | 16 y                                           | 27 y                     | 24 mo                      | 15 mo                      | 13 mo                      | 22 mo                      | 4 mo                       | 2 mo                       | 6 mo                       | 8 mo                       | 5 weeks                    | 3 mo                         |
| ALC (cells/ $\mu$ L)                                       | 1,820                                          | 687                      | 9,630                      | 4,100                      | 3,400                      | 830                        | 4,300                      | n.a.                       | 1,700                      | 1,230                      | 8,230                      | 12,500                       |
| Eosinophils/ $\mu$ L                                       | 260                                            | n.a.                     | 200                        | 100                        | 590                        | 980                        | 300                        | n.a.                       | 150                        | 580                        | 13,200                     | 1,780                        |
| CD3 <sup>+</sup> cells/ $\mu$ L                            | 581                                            | 391                      | 160                        | 3,973                      | 2,300                      | 423                        | 2,550                      | 11140                      | 629                        | 1,119                      | 3,424                      | 4,442                        |
| CD4 <sup>+</sup> cells/ $\mu$ L                            | 530                                            | 225                      | 108                        | 3,296                      | 80                         | 191                        | 212                        | 6204                       | 497                        | 726                        | 3,368                      | 3,109                        |
| CD8 <sup>+</sup> cells/ $\mu$ L                            | 80                                             | 162                      | 10                         | 668                        | 840                        | 41                         | 1,731                      | 4931                       | 101                        | 394                        | 0                          | 1,036                        |
| CD45RA <sup>+</sup> cells<br>(% of CD4 <sup>+</sup> cells) | 6                                              | 11                       | n.d.                       | 3                          | 0                          | 2                          | 9.2                        | 1                          | 3.8                        | 1                          | 0                          | n.d.                         |
| $\gamma\delta$ T cells<br>(% of CD3 <sup>+</sup> cells)    | n.d.                                           | n.d.                     | n.d.                       | 2.1                        | 69                         | 7.2                        | 23.8                       | n.d.                       | n.d.                       | 0.1                        | 0                          | n.d.                         |
| CD19 <sup>+</sup> cells/ $\mu$ L                           | 460                                            | 78                       | 359                        | 0 <sup>#</sup>             | 620                        | 100                        | 193                        | 0                          | 2                          | 0                          | 0                          | 30                           |
| CD16/56 <sup>+</sup> cells/ $\mu$ L                        | 450                                            | 215                      | 340                        | 66                         | 460                        | 290                        | 1,121                      | 4,564                      | 1,015                      | 98                         | 5,003                      | 8,000                        |
| Proliferative<br>response to PHA                           | ↓                                              | normal                   | ↓                          | ↓                          | ↓                          | ↓                          | n.d.                       | ↓↓                         | absent                     | absent                     | absent                     | ↓↓                           |
| IgG (mg/dL)                                                | 411                                            | 1,000 <sup>^</sup>       | 1,570                      | 153                        | 2,420                      | 1104                       | 2,080                      | 10                         | 900 <sup>^</sup>           | 1,003 <sup>^</sup>         | 39                         | 2,340                        |
| IgA (mg/dL)                                                | <5                                             | <5                       | 77                         | 15                         | 194                        | 153                        | 98                         | 6                          | 110                        | 323                        | 22                         | 72                           |
| IgM (mg/dL)                                                | 38                                             | 25                       | 230                        | <10                        | 328                        | 108                        | 275                        | 302                        | 35                         | 7                          | 16                         | 27                           |
| IgE (IU/mL)                                                | <1                                             | <2                       | 227                        | 126                        | 5.6                        | 15                         | 213                        | >5000                      | 12                         | >50,000                    | <2                         | 5                            |

|                    |                                    |                                                                                                                  |                                       |                                          |                                              |         |                 |              |                        |                           |                                           |                          |
|--------------------|------------------------------------|------------------------------------------------------------------------------------------------------------------|---------------------------------------|------------------------------------------|----------------------------------------------|---------|-----------------|--------------|------------------------|---------------------------|-------------------------------------------|--------------------------|
| Skin rash          | no                                 | Freckling<br>(café au lait)<br>in axilla and<br>chest                                                            | yes<br>(vasculitis)                   | yes, but not<br>consistent<br>with Omenn | no                                           | yes     | yes, diffuse    | yes, diffuse | yes, diffuse           | yes, diffuse              | yes, diffuse                              | yes, diffuse             |
| Lymphadenopathy    | yes                                | no                                                                                                               | no                                    | no                                       | no                                           | no      | yes             | yes          | yes                    | no                        | yes                                       | yes                      |
| Hepatosplenomegaly | no                                 | no                                                                                                               | no                                    | yes                                      | no                                           | no      | no              | no           | yes                    | yes                       | no                                        | yes                      |
| Infections         | VZV<br>(zoster),<br>rec. sinusitis | disseminated<br>VZV, rec.<br>sinusitis,<br><i>Cryptococcus</i><br>meningitis,<br><i>Pseudomonas</i><br>pneumonia | rec. URTI                             | Norovirus,<br>CVL sepsis                 | chronic<br>CMV,<br>pyodermitis,<br>pneumonia | CMV     | CMV,<br>candida | CMV          | diarrhea,<br>pneumonia | PJP,<br>adenovirus        | pneumonia,<br>skin<br>infection<br>(MRSA) | diarrhea,<br>lip abscess |
| Autoimmunity       | ITP,<br>Coombs +,<br>vitiligo      | suspected ITP                                                                                                    | vasculitis,<br>AIHA, ITP,<br>myositis | AIHA                                     | AIHA                                         | AIHA    | AIHA            | no           | no                     | autoimmun<br>e hepatitis? | no                                        | no                       |
| Granulomas         | lungs                              | lungs                                                                                                            | no                                    | no                                       | no                                           | no      | no              | no           | no                     | no                        | no                                        | no                       |
| Reference          | (48)                               | CID-9 in (49)                                                                                                    | (6)                                   | unpubl.                                  | LS6 in (49)                                  | unpubl. | LS5 in (49)     | unpubl.      | unpubl.                | unpubl.                   | unpubl.                                   | (50)                     |

#after rituximab (previous count: 538 CD19<sup>+</sup> cells/ $\mu$ l)

^on intravenous immunoglobulins

AIHA: autoimmune hemolytic anemia; CID: combined immune deficiency; CMV: cytomegalovirus; CVL: central venous line;  $\gamma\delta$ T: leaky SCID with expansion of TCR $\gamma\delta$ <sup>+</sup> T cells; ITP: immune thrombocytopenic purpura; LS: leaky SCID; MRSA: methicillin-resistant *S. aureus*; PJP: *Pneumocystis jiroveci* pneumonia; rec: recurrent; TCR: T cell receptor; unpubl.: unpublished; URTI: upper respiratory tract infections; VZV: varicella zoster virus

↓,  $\geq 15$  and  $< 30\%$  of healthy control value; ↓↓,  $< 15\%$  of healthy control value; absent,  $< 5\%$  of healthy control value

**Table S2. Summary of RAG mutations, recombination activity, and results of IGH and TRB sequencing in healthy donors and patients with RAG deficiency**

| Patient |                  | Gene | Allele 1   |                       | Allele 2   |                       | IGH Sequences |        |              | TRB Sequences |        |              |
|---------|------------------|------|------------|-----------------------|------------|-----------------------|---------------|--------|--------------|---------------|--------|--------------|
| Code    | Diagnosis        |      | Mutation   | Activity<br>(% of WT) | Mutation   | Activity<br>(% of WT) | Total         | Unique | Unique/Total | Total         | Unique | Unique/Total |
| C1      | HD               |      |            |                       |            |                       | 3899          | 3587   | 92.00%       | 1007          | 363    | 36.05%       |
| C2      | HD               |      |            |                       |            |                       | 5894          | 4943   | 83.86%       | 852           | 363    | 42.61%       |
| C3      | HD               |      |            |                       |            |                       | 2006          | 1888   | 94.12%       | 4915          | 3140   | 63.89%       |
| C4      | HD               |      |            |                       |            |                       | 4389          | 4223   | 96.22%       | NA            | NA     |              |
| CID1    | CID              | RAG1 | H612R      | 100%                  | K86Vfs*33  | 2.65%                 | 5667          | 4516   | 79.69%       | ND            | ND     |              |
| CID2    | CID              | RAG2 | F62L       | 19.60%                | F62L       | 19.60%                | 2494          | 1975   | 79.19%       | 1086          | 231    | 21.27%       |
| CID3    | CID              | RAG1 | F974L      | 56.50%                | R841Q      | 0.00%                 | 3538          | 1903   | 53.79%       | 12399         | 545    | 4.40%        |
| CID4    | CID              | RAG1 | W522C      | 41.65%                | R973C      | 0.00%                 | NA            | NA     |              | 2092          | 385    | 18.40%       |
| LS1     | $\gamma\delta$ T | RAG1 | K86Vfs*33  | 2.65%                 | K86Vfs*33  | 2.65%                 | 4038          | 2752   | 68.15%       | ND            | ND     |              |
| LS2     | LS               | RAG1 | K86Vfs*33  | 2.65%                 | R404Q      | 1.18%                 | NA            | NA     |              | 3821          | 490    | 12.82%       |
| LS3     | $\gamma\delta$ T | RAG1 | R108X      | 1.80%                 | R108X      | 1.80%                 | 1122          | 440    | 39.22%       | 9370          | 177    | 1.89%        |
| OS1     | OS               | RAG1 | R561H      | 1.98%                 | R624C      | 0.00%                 | 1521          | 30     | 1.97%        | NA            | NA     |              |
| OS2     | OS               | RAG1 | K391E      | 6.54%                 | K391E      | 6.54%                 | ND            | ND     |              | 6301          | 464    | 7.36%        |
| OS3     | OS               | RAG1 | R396C      | 0.56%                 | R737H      | 0.23%                 | 801           | 55     | 6.87%        | NA            | NA     |              |
| OS4     | OS               | RAG1 | W959X      | 0.01%                 | W959X      | 0.01%                 | ND            | ND     |              | 17884         | 43     | 0.24%        |
| OS5     | OS               | RAG1 | C469Wfs*20 | 0.00%                 | C469Wfs*20 | 0.00%                 | 6706          | 216    | 3.22%        | ND            | ND     |              |

C: control; CID: combined immune deficiency;  $\gamma\delta$ T: "leaky" severe combined immune deficiency with expansion of T-cell receptor  $\gamma\delta$ + T cells; HD: healthy donor; *IGH*: Immunoglobulin Heavy Chain locus; LS: leaky SCID; ND: not detectable; NA: not available; OS: Omenn syndrome; SCID: severe combined immune deficiency; *TRB*: T cell receptor  $\beta$  locus; WT: wild-type

fig. S1. Diversity indices of *IGH* and *TRB* repertoire.

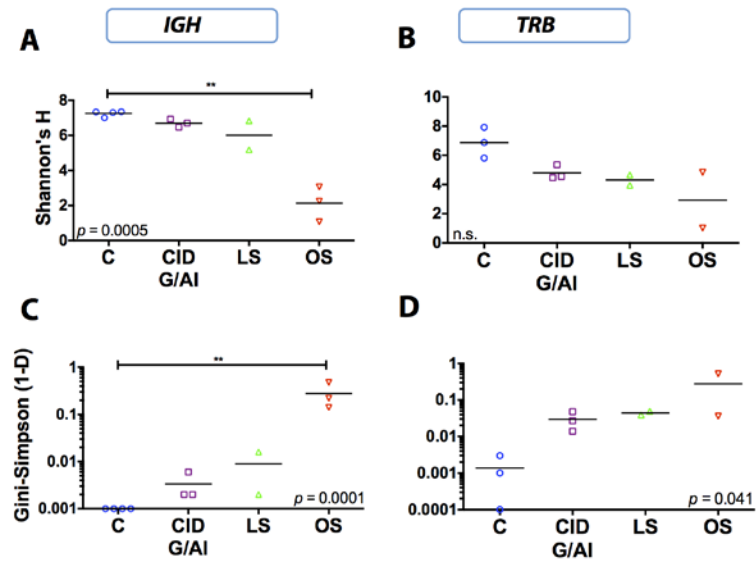

Shannon's H index of diversity for *IGH* (A) and *TRB* (B) repertoires for patients with RAG deficiency and healthy controls. Gini-Simpson's index of unevenness for *IGH* (C) and *TRB* (D) repertoires for patients with RAG deficiency and healthy controls. (Mean; ANOVA with Dunnett's correction for multiple comparison;  $p > 0.05$  (n.s.) not significant). Data shown are on total sequences.



fig. S2. Differential usage of *V*, *D* and *J* genes in the *IGH* and *TRB* repertoires of patients with RAG deficiency.

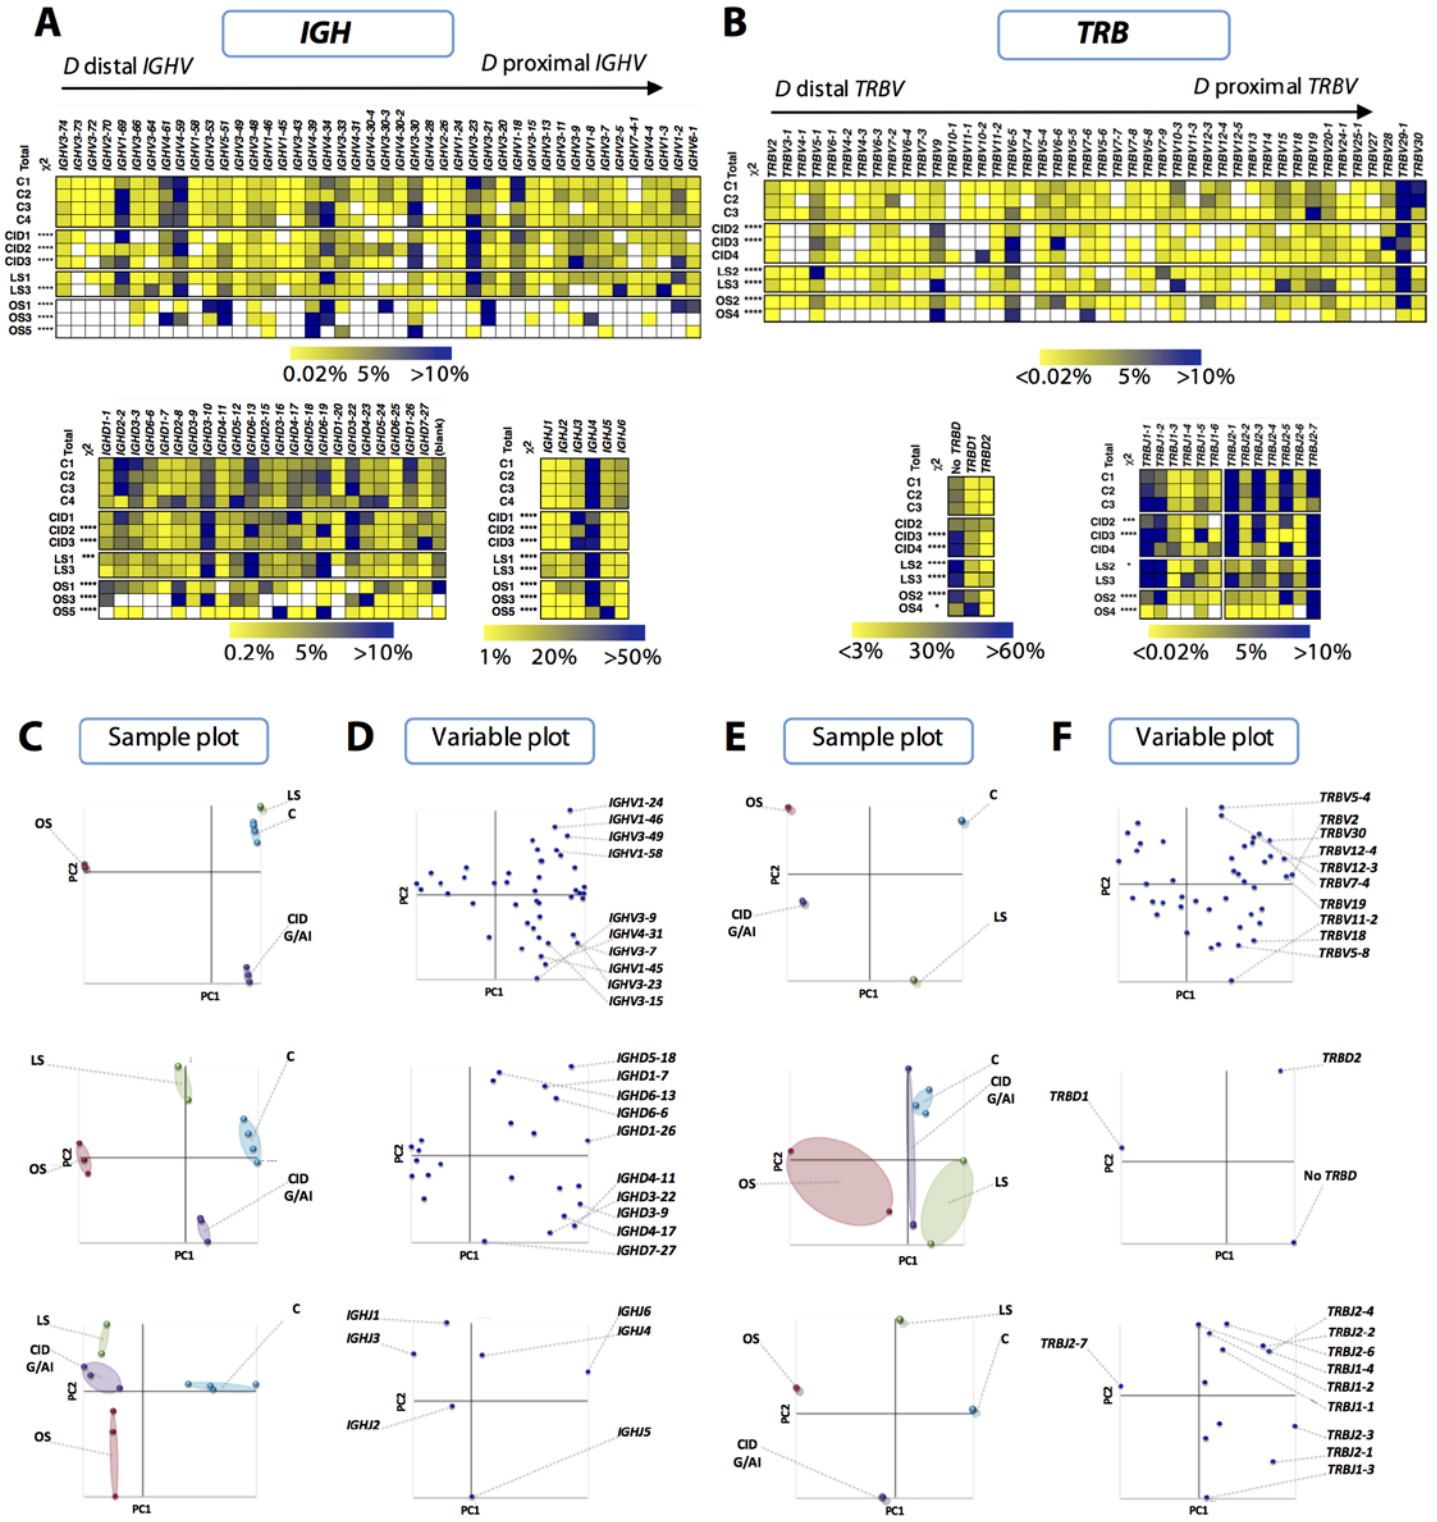

Heat map representing the frequency of *V*, *D* and *J* gene usage among total *IGH* (**A**) and *TRB* (**B**) sequences from healthy controls and patients with *RAG* mutations. Sample (**C**) and variable (**D**) plots for the differential usage of *IGHV*, *IGHD* and *IGHJ* genes, segregating control and patient samples, and the various genes according to Primary Component (PC)1 and PC2. Sample (**E**) and variable (**F**) plots for the differential usage of *TRBV*, *TRBD* and *TRBJ* genes, segregating control and patient samples and the various genes according to PC1 and PC2.

fig. S3. Characterization of the CDR3 region of *IGH* and *TRB* total sequences in peripheral blood lymphocytes.

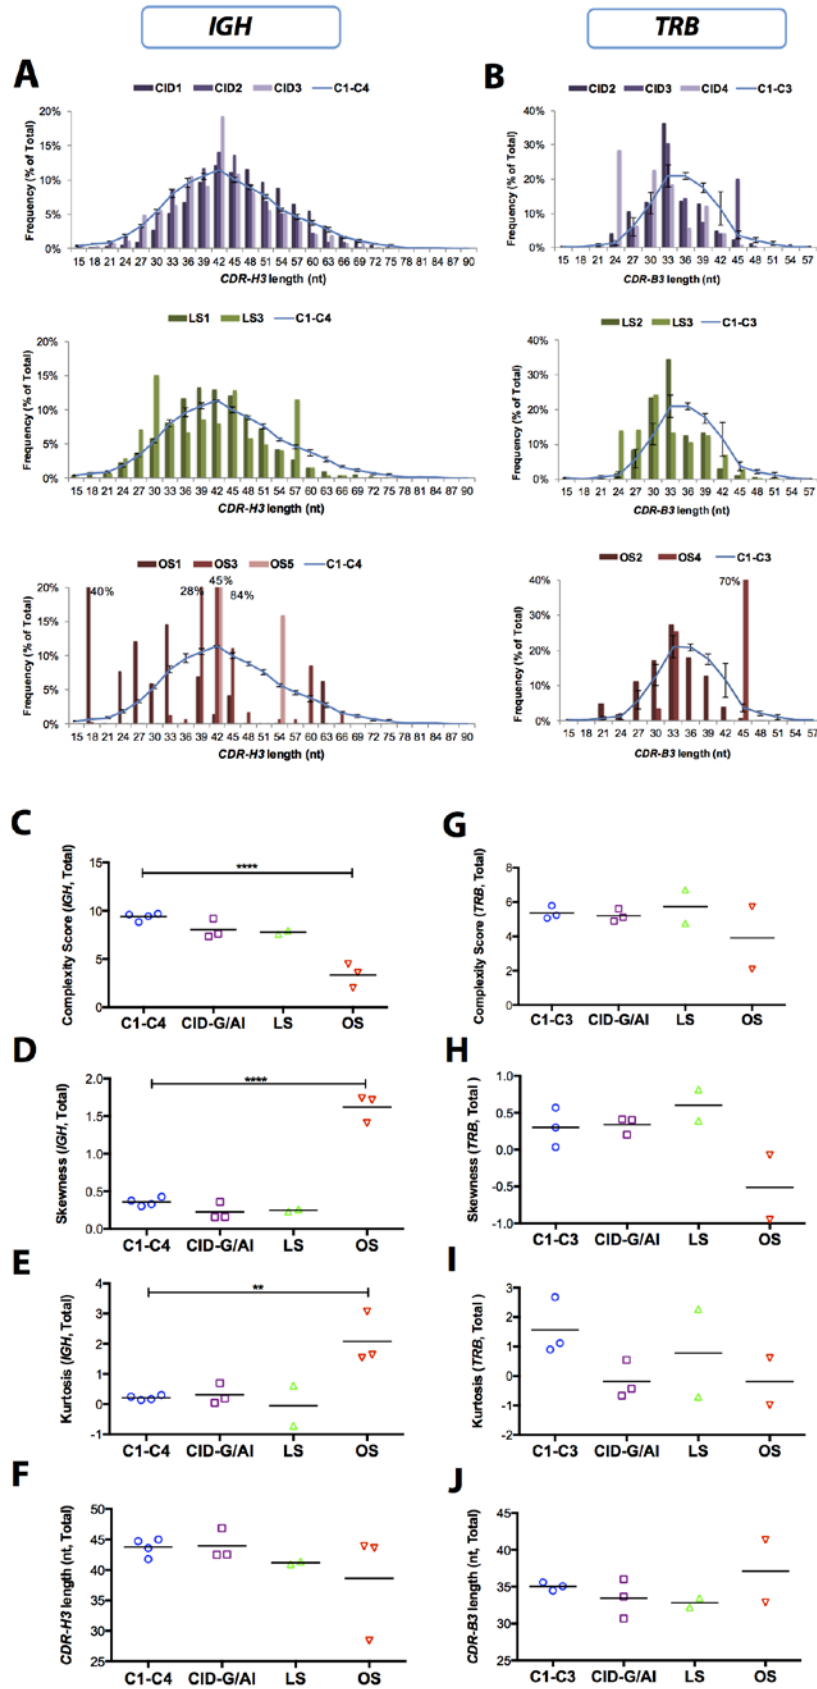

Distribution of the length of the CDR3 region of *IGH* (CDR-H3) (**A**) and *TRB* (CDR-B3) (**B**) total sequences from peripheral blood of patients with RAG deficiency and healthy controls (C1-C4; C6-C8). The distribution of the CDR3 length in healthy controls is depicted as a blue line (representing mean values  $\pm$  SE). (mean  $\pm$  SE). Complexity scores (**C, G**), skewness (**D, H**), kurtosis (**E, I**) and average length in nucleotides (nt) (**F, J**) of the *IGH* (**C-F**) and *TRB* (**G-J**) CDR3 unique sequences in patients with RAG deficiency and controls. In panels C-J, for each group, mean values are shown, and statistical significance was assessed by ANOVA.

fig. S4. P and N nucleotide addition in the CDR3 region of unique *IGH* and *TRB* sequences in healthy controls and patients with RAG deficiency.

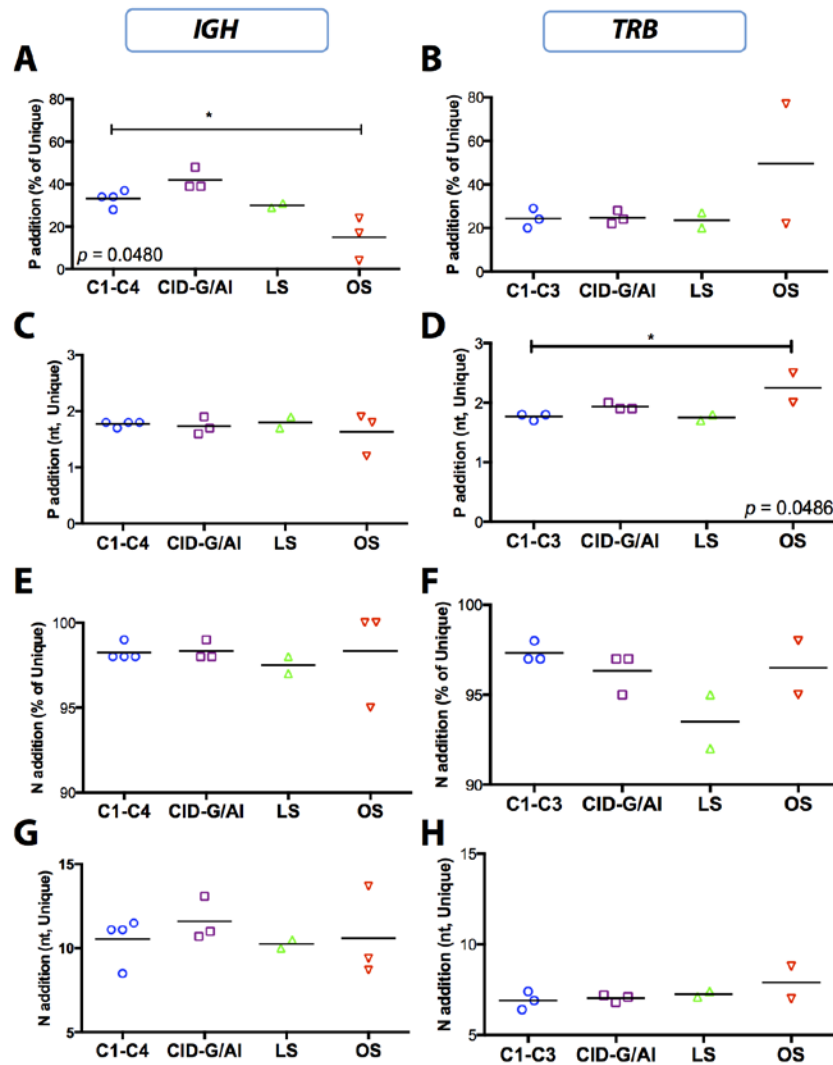

Percentage of unique *IGH* (A) and *TRB* (B) sequences with P nucleotide addition in healthy controls (C1-C4; C6-C8) and patients with RAG mutations and various clinical phenotypes. Average number of P nucleotide addition in *IGH* (C) and *TRB* (D) unique sequences from healthy controls and patients with RAG mutations. Percentage of unique *IGH* (E) and *TRB* (F) sequences with N nucleotide addition in healthy controls and patients with RAG mutations. Average number of N nucleotide addition in *IGH* (G) and *TRB* (H) unique sequences from healthy controls and patients with RAG mutations. Horizontal bars represent mean values. Statistical significance was assessed by ANOVA.

fig. S5. Germline index and frequency of sequences without P and N nucleotides in the *TRB* repertoire of patients with RAG deficiency and controls.

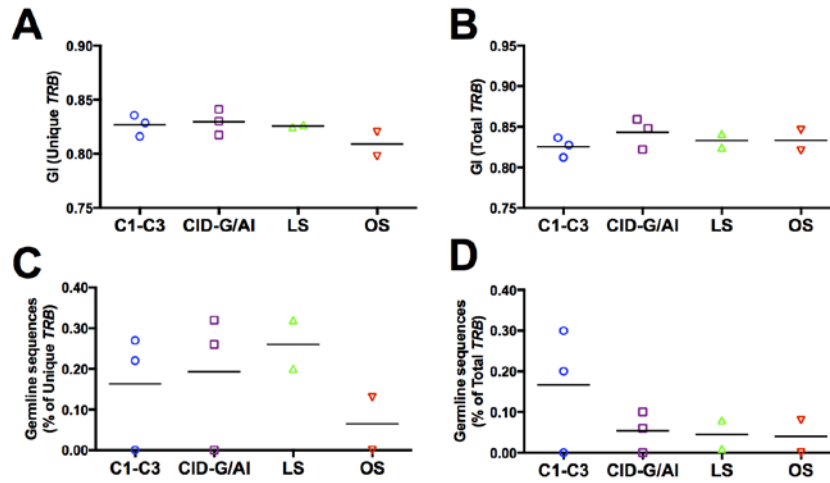

Germline index (GI) of unique (A) and total (B) *TRB* sequences from healthy controls (C1-C4; C6-C8) and RAG-mutated patients. Proportion of unique (C) and total (D) *TRB* transcripts without P and N nucleotide addition.

**fig. S6. Distribution of immunoglobulin heavy chain isotypes among total *IGH* sequences from controls and patients with RAG deficiency.**

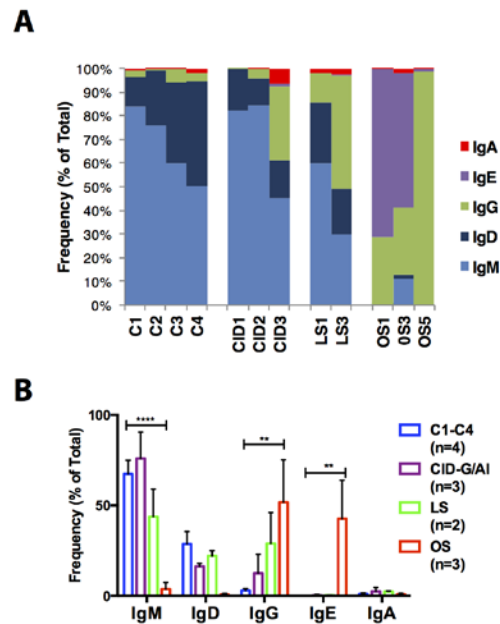

Frequency of immunoglobulin heavy chain constant gene usage among total *IGH* sequences from peripheral blood lymphocytes of RAG-deficient patients and healthy controls (**A**, **B**). In panel **B**, mean values  $\pm$  SE are shown. Statistical analysis was performed with unpaired t-test.

**fig. S7. Inference of antigen-mediated selection in combined and individual IgM, IgG and IgE transcripts from healthy controls (C1-C4) and patients with RAG deficiency.**

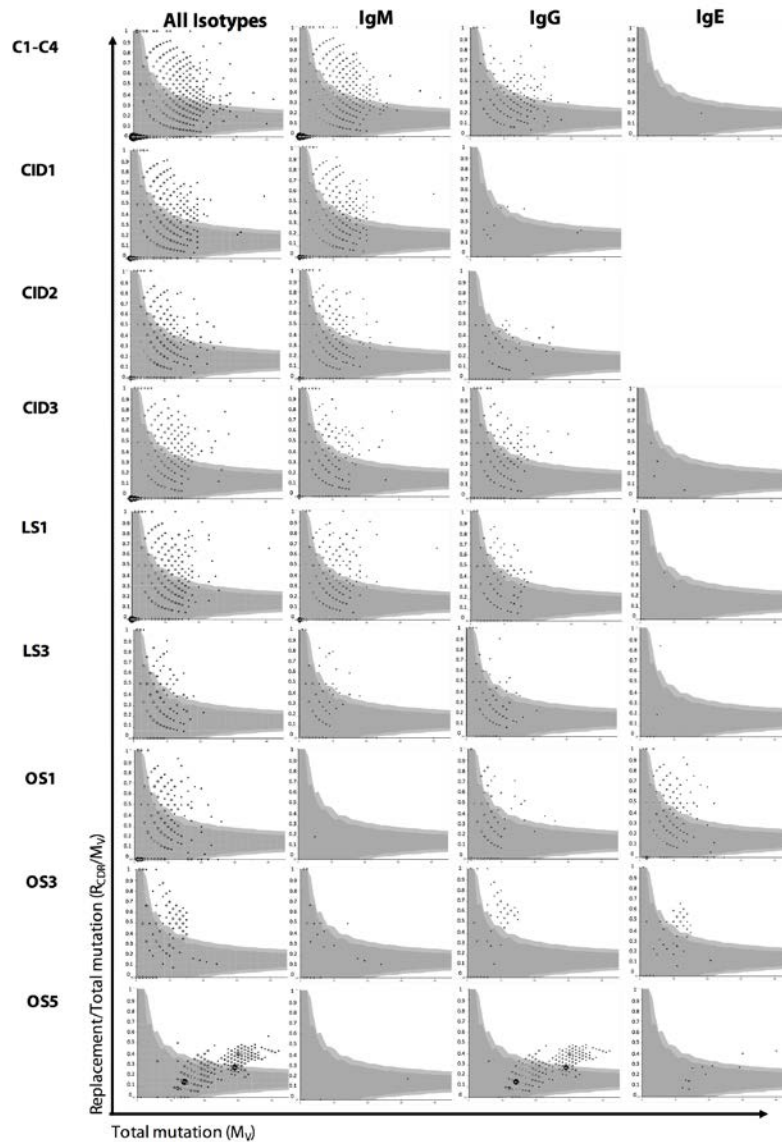

Graphical representation of antigen-mediated selection in all isotypes, and in *IGHM*, *IGHG* and *IGHE* transcripts, with the ratio of replacement mutations in CDR-H1 and CDR-H2 ( $R_{CDR}$ ) to the total number of mutations in the V region ( $M_V$ ), plotted against  $M_V$ . The dark shaded area represents 90% confidence limit for the probability of random mutations, and the light grey shaded area represents 95% confidence limits for the probability of random mutations. Data points falling outside the light grey shaded area represent the portion for antigen-mediated selection, with probability of random mutation being  $p = 0.1$  (dark grey area) and  $p = 0.05$  (light grey area).
